# Supplementary material for: Ba2B7O12F with novel FBB [B7O16F] and deep-ultraviolet cut-off edge
Source: Royal Society of Chemistry journal article supplement (doi:10.1039/d0qi00924e), 2020-10-30
Supplement: d0qi00924e1.pdf [file d0qi00924e1.pdf]

## Electronic Supplementary Information

### **Ba<sub>2</sub>B<sub>7</sub>O<sub>12</sub>F with Novel FBB [B<sub>7</sub>O<sub>16</sub>F] and Deep-ultraviolet Cutoff Edge**

Zhaohong Miao,<sup>‡a,b</sup> Yun Yang,<sup>‡a</sup> Zhonglei Wei,<sup>a,b</sup> Zhihua Yang<sup>a</sup> and Shilie Pan<sup>\*a</sup>

<sup>a</sup>CAS Key Laboratory of Functional Materials and Devices for Special Environments,  
Xinjiang Technical Institute of Physics & Chemistry, CAS; Xinjiang Key Laboratory of  
Electronic Information Materials and Devices, 40-1 South Beijing Road, Urumqi  
830011, China;

<sup>b</sup>Center of Materials Science and Optoelectronics Engineering,  
University of Chinese Academy of Sciences, Beijing 100049, China.

E-mail: [slpan@ms.xjb.ac.cn](mailto:slpan@ms.xjb.ac.cn)

### Content

|                                                                                                                                                                                                                     |    |
|---------------------------------------------------------------------------------------------------------------------------------------------------------------------------------------------------------------------|----|
| <b>Experimental Section</b>                                                                                                                                                                                         | 2  |
| <b>Table S1</b> Crystal data and structure refinement for Ba <sub>2</sub> B <sub>7</sub> O <sub>12</sub> F.                                                                                                         | 5  |
| <b>Table S2</b> Atomic coordinates ( $\times 10^4$ ), equivalent isotropic displacement parameters ( $\text{\AA}^2 \times 10^3$ ) and bond valence sums (BVS) for Ba <sub>2</sub> B <sub>7</sub> O <sub>12</sub> F. | 6  |
| <b>Table S3</b> Bond lengths [ $\text{\AA}$ ] and angles [ $^\circ$ ] for Ba <sub>2</sub> B <sub>7</sub> O <sub>12</sub> F.                                                                                         | 7  |
| <b>Table S4</b> The summary of published fluorooxoborates.                                                                                                                                                          | 11 |
| <b>Figure S1.</b> The different types of FBBs in published fluorooxoborates.                                                                                                                                        | 12 |
| <b>Figure S2.</b> The energy dispersive X-ray spectrum for Ba <sub>2</sub> B <sub>7</sub> O <sub>12</sub> F.                                                                                                        | 13 |
| <b>Figure S3.</b> The infrared spectrum of Ba <sub>2</sub> B <sub>7</sub> O <sub>12</sub> F.                                                                                                                        | 14 |
| <b>Figure S4.</b> The coordination environments of the Ba <sup>2+</sup> cations in Ba <sub>2</sub> B <sub>7</sub> O <sub>12</sub> F.                                                                                | 15 |
| <b>Figure S5.</b> TG-DSC curves of Ba <sub>2</sub> B <sub>7</sub> O <sub>12</sub> F (a), and the XRD patterns of the melted residual (b).                                                                           | 16 |
| <b>References</b>                                                                                                                                                                                                   | 17 |

## Experimental Section

**Reagents** BaF<sub>2</sub> (Shanghai Aladdin Reagent Co., Ltd., 98.0%), CsF (Shanghai Aladdin Reagent Co., Ltd., 98.0%), H<sub>3</sub>BO<sub>3</sub> (Tianjin Bodi Chemical Co., Ltd., Ltd., 99.5%) were selected to obtain target product.

**Crystal Synthesis** Single crystal of Ba<sub>2</sub>B<sub>7</sub>O<sub>12</sub>F was obtained by high-temperature solution method. Mixtures of BaF<sub>2</sub>, CsF and H<sub>3</sub>BO<sub>3</sub> in a molar ratio of 1: 2: 9 with total weight of 3.5 g were prepared in a platinum (Pt) crucible, which was put into a programmable temperature furnace. It was preheated to 200 °C within 1 h, and kept at this temperature for 4 h to ensure H<sub>3</sub>BO<sub>3</sub> decompose completely. Then, it was heated to 700 °C for 5 h and kept at this temperature for 12 h to ensure the mixtures melt entirely. Then the solution was cooled to 670 °C for 25 minutes and kept at this temperature for 2 h, then cooled to 450 °C at the rate of 1 °C·h<sup>-1</sup>. Finally, the furnace was turned off and cooled to room temperature. Transparent and colorless Ba<sub>2</sub>B<sub>7</sub>O<sub>12</sub>F crystals were obtained.

**Solid-State Synthesis** The Ba<sub>2</sub>B<sub>7</sub>O<sub>12</sub>F polycrystalline was obtained by solid-state reaction techniques. Mixtures of BaF<sub>2</sub> and H<sub>3</sub>BO<sub>3</sub> in a molar ratio of 2: 7 with total weight of 6 g were ground thoroughly and put into a corundum crucible. First, the mixtures were heated to 200 °C and kept at this temperature for 24 h to make sure H<sub>3</sub>BO<sub>3</sub> decompose into H<sub>2</sub>O and B<sub>2</sub>O<sub>3</sub> completely. Then, with several intermediate grindings, the pre-sintered mixtures were heated slowly to 700 °C and held at this temperature for 24 h to ensure that the reaction was complete. Finally, the purity of the sample was confirmed by powder XRD.

**Single-Crystal X-ray Diffraction** The crystal of Ba<sub>2</sub>B<sub>7</sub>O<sub>12</sub>F with dimensions 0.098 × 0.085 × 0.068 mm<sup>3</sup> was filtered to determine the structure. The structure was observed by single-crystal X-ray diffraction on an APEX II CCD diffractometer using monochromatic Mo K $\alpha$  radiation ( $\lambda = 0.71073$  Å) at 296(2) K and integrated with the SAINT program.<sup>1</sup> The full-matrix least-squares method in the SHELXL-97 systems was used to refine the structures and final least-squares refinement was on  $F_o^2$  with data having  $F_o^2 \geq 2\sigma(F_o^2)$ .<sup>2</sup> The missing symmetry elements of the structures were verified with PLATON.<sup>3</sup> Relevant crystallographic data and structure refinement information are displayed in Table S1. Atomic coordinates and equivalent isotropic displacement parameters are listed in Table S2. Interatomic bond lengths and angles are given in Table S3.

**Powder X-ray Diffraction** PXRD patterns were taken on an automated Bruker D2 X-ray

diffractometer equipped with a Cu K $\alpha$  radiation source ( $\lambda = 1.5418 \text{ \AA}$ ,  $T = 296 \text{ K}$ ). The scanning over the range of  $2\theta = 10\sim 70^\circ$ . The step width of  $2\theta$  was  $0.01^\circ$  and a fixed counting time was  $0.5 \text{ s/step}$ .

**IR Spectrum** Infrared spectrum was carried out on a Shimadzu IR Affinity-1 Fourier transform Infrared spectrometer. And the wavelength ranges from  $400$  to  $4000 \text{ cm}^{-1}$ . The test was carried out by thoroughly mixing sample and dried KBr ( $5 \text{ mg}$  of the sample and  $500 \text{ mg}$  of KBr).

**UV-Vis-NIR Diffuse Reflectance Spectroscopy** The UV-Vis-NIR Diffuse Reflectance spectrum of  $\text{Ba}_2\text{B}_7\text{O}_{12}\text{F}$  powder sample was measured on the SolidSpec-3700DUV spectrophotometer at room temperature with scanning wavelength over the range of  $190$  to  $2600 \text{ nm}$ . The absorption data was obtained by the Kubelka-Munk function:  $F(R)=(1-R)^2/2R=K/S$ , where  $R$  is the reflectance,  $K$  is the absorption, and  $S$  is the scattering.

**The Energy Dispersive X-ray Spectroscopy** Elemental analysis of  $\text{Ba}_2\text{B}_7\text{O}_{12}\text{F}$  was performed on a clean single crystal surface with the aid of a field emission scanning electron microscope (SEM, SUPRA 55VP) equipped with an energy dispersive X-ray spectroscopy (BRUKER x-flash-sdd-5010).

**Thermal Analysis** The thermogravimetry and differential scanning calorimetry (TG-DSC) for  $\text{Ba}_2\text{B}_7\text{O}_{12}\text{F}$  was implemented on a NETZSCH STA 449 F3 simultaneous thermal analyzer with over the range of  $40$  to  $1000^\circ\text{C}$  at a speed of  $5^\circ\text{C}\cdot\text{min}^{-1}$  under flowing nitrogen. To further verify the thermal behaviors of  $\text{Ba}_2\text{B}_7\text{O}_{12}\text{F}$ . The pure solid sample was put into a small platinum Pt crucible and heated from room temperature (RT) to  $950^\circ\text{C}$  until it melted transparently. Then it was slowly cooled down to RT. The powder XRD analysis result shown in Figure S5b reveals that the residual is not the initial compound, which suggests that  $\text{Ba}_2\text{B}_7\text{O}_{12}\text{F}$  is an incongruent melting compound.

**Theoretical Calculations** Based on the density functional theory (DFT), electronic-structure and optical property calculations were implemented in the CASTEP package.<sup>4</sup> For embodying correlation, core-electron interactions were characterized by norm-conserving pseudopotentials (NCP). Meanwhile the generalized gradient approximation (GGA) of Perdew-Buker-Ernzerhof (PBE) was exerted.<sup>5-7</sup> Then geometry optimization  $\text{Ba}_2\text{B}_7\text{O}_{12}\text{F}$  in unit cell was performed with a good converged criterion which was fixed to the origin structure. The value of plane-wave basis cutoff energy  $850 \text{ eV}$  and  $3 \times 2 \times 1$  Monkhorst-Pack  $k$ -point meshes were carried out in calculation.<sup>8</sup>

**Table S1** Crystal data and structure refinement for Ba<sub>2</sub>B<sub>7</sub>O<sub>12</sub>F.

|                                                                  |                                                                                        |
|------------------------------------------------------------------|----------------------------------------------------------------------------------------|
| Empirical formula                                                | Ba <sub>2</sub> B <sub>7</sub> O <sub>12</sub> F                                       |
| Formula weight                                                   | 561.35                                                                                 |
| Temperature                                                      | 296(2) K                                                                               |
| Wavelength                                                       | 0.71073 Å                                                                              |
| Crystal system, space group                                      | Monoclinic, C2/c                                                                       |
| Unit cell dimensions                                             | $a = 9.328(3)$ Å<br>$b = 10.910(3)$ Å, $\beta = 100.136(4)^\circ$<br>$c = 18.817(6)$ Å |
| Volume                                                           | 1885.1(10) Å <sup>3</sup>                                                              |
| Z, Calculated density                                            | 8, 3.956 Mg/m <sup>3</sup>                                                             |
| Absorption coefficient                                           | 8.397 mm <sup>-1</sup>                                                                 |
| F(000)                                                           | 2016                                                                                   |
| Crystal size                                                     | 0.098 × 0.085 × 0.068 mm <sup>3</sup>                                                  |
| Theta range for data collection                                  | 2.199 to 27.516°                                                                       |
| Limiting indices                                                 | -12 ≤ <i>h</i> ≤ 9, -13 ≤ <i>k</i> ≤ 14, -24 ≤ <i>l</i> ≤ 24                           |
| Reflections collected / unique                                   | 5729 / 2166 [ <i>R</i> <sub>int</sub> = 0.0357]                                        |
| Completeness to theta = 27.516°                                  | 99.90%                                                                                 |
| Refinement method                                                | Full-matrix least-squares on <i>F</i> <sup>2</sup>                                     |
| Data / restraints / parameters                                   | 2166 / 24 / 201                                                                        |
| Goodness-of-fit on <i>F</i> <sup>2</sup>                         | 1.015                                                                                  |
| Final <i>R</i> indices [ <i>I</i> > 2σ( <i>I</i> )] <sup>a</sup> | <i>R</i> <sub>1</sub> = 0.0255, <i>wR</i> <sub>2</sub> = 0.0507                        |
| <i>R</i> indices (all data) <sup>a</sup>                         | <i>R</i> <sub>1</sub> = 0.0321, <i>wR</i> <sub>2</sub> = 0.0531                        |
| Extinction coefficient                                           | 0.00068(4)                                                                             |
| Largest diff. peak and hole                                      | 1.093 and -1.058 e·Å <sup>-3</sup>                                                     |

$$^a R_1 = \sum ||F_o| - |F_c|| / \sum |F_o| \text{ and } wR_2 = [\sum w(F_o^2 - F_c^2)^2 / \sum w F_o^4]^{1/2} \text{ for } F_o^2 > 2\sigma(F_o^2)$$

**Table S2** Atomic coordinates ( $\times 10^4$ ), equivalent isotropic displacement parameters ( $\text{\AA}^2 \times 10^3$ ) and bond valence sums (BVS) for  $\text{Ba}_2\text{B}_7\text{O}_{12}\text{F}$ .

|       | x        | y        | z       | U(eq) | BVS   |
|-------|----------|----------|---------|-------|-------|
| Ba(1) | 0        | 5358(1)  | 2500    | 10(1) | 2.03  |
| Ba(2) | -97(1)   | 12126(1) | 256(1)  | 9(1)  | 2.103 |
| Ba(3) | 0        | 9880(1)  | 2500    | 12(1) | 1.981 |
| B(1)  | 2152(6)  | 5327(5)  | 4359(3) | 7(1)  | 3.026 |
| B(2)  | 1446(6)  | 7524(5)  | 3806(3) | 6(1)  | 2.991 |
| B(3)  | -1863(6) | 9618(4)  | 706(3)  | 3(1)  | 3.017 |
| B(4)  | 600(6)   | 4993(5)  | 785(3)  | 6(1)  | 3.071 |
| B(5)  | 2489(6)  | 3720(5)  | 3446(3) | 5(1)  | 3.026 |
| B(6)  | -2664(6) | 7429(5)  | 2326(3) | 6(1)  | 3.08  |
| B(7)  | -2569(6) | 11462(5) | 1409(3) | 8(1)  | 3.058 |
| O(1)  | -1504(3) | 10677(3) | 1166(2) | 7(1)  | 2.122 |
| O(2)  | -2442(4) | 12724(3) | 1115(2) | 9(1)  | 1.953 |
| O(3)  | 2591(4)  | 8609(3)  | 2290(2) | 11(1) | 2.121 |
| O(4)  | 1457(4)  | 7371(3)  | 3077(2) | 8(1)  | 2.161 |
| O(5)  | 904(4)   | 6091(3)  | 1114(2) | 12(1) | 1.998 |
| O(6)  | 2548(4)  | 4903(3)  | 3671(2) | 8(1)  | 1.938 |
| O(7)  | 817(4)   | 4645(3)  | 4442(2) | 8(1)  | 1.929 |
| O(8)  | 1954(3)  | 6677(3)  | 4315(2) | 7(1)  | 2.052 |
| O(9)  | 838(3)   | 8593(3)  | 4009(2) | 7(1)  | 2.044 |
| O(10) | 3309(3)  | 5074(3)  | 4963(2) | 5(1)  | 2.012 |
| O(11) | -3338(3) | 9156(3)  | 734(2)  | 7(1)  | 2.021 |
| O(12) | -2619(4) | 6413(3)  | 2809(2) | 9(1)  | 2.151 |
| F(1)  | 963(3)   | 12398(3) | 1830(2) | 16(1) | 0.875 |

**Table S3** Bond lengths [ $\text{\AA}$ ] and angles [ $^\circ$ ] for  $\text{Ba}_2\text{B}_7\text{O}_{12}\text{F}$ .

|                |          |                        |            |
|----------------|----------|------------------------|------------|
| Ba(1)-O(4)#1   | 2.707(3) | O(1)-Ba(2)-O(2)        | 48.36(8)   |
| Ba(1)-O(4)     | 2.707(3) | O(10)#6-Ba(2)-O(2)     | 83.21(9)   |
| Ba(1)-O(12)    | 2.852(3) | O(10)#7-Ba(2)-O(2)     | 137.98(8)  |
| Ba(1)-O(12)#1  | 2.852(3) | O(7)#8-Ba(2)-O(2)      | 58.41(8)   |
| Ba(1)-O(3)#2   | 2.922(3) | O(8)#7-Ba(2)-O(2)      | 132.22(9)  |
| Ba(1)-O(3)#3   | 2.922(3) | F(1)-Ba(2)-O(2)        | 65.70(9)   |
| Ba(1)-O(6)#1   | 2.985(3) | O(9)#4-Ba(2)-O(8)#4    | 46.94(8)   |
| Ba(1)-O(6)     | 2.985(3) | O(11)#5-Ba(2)-O(8)#4   | 57.89(8)   |
| Ba(1)-O(5)#1   | 2.988(3) | O(1)-Ba(2)-O(8)#4      | 168.30(9)  |
| Ba(1)-O(5)     | 2.988(3) | O(10)#6-Ba(2)-O(8)#4   | 126.87(8)  |
| Ba(2)-O(9)#4   | 2.758(3) | O(10)#7-Ba(2)-O(8)#4   | 79.31(8)   |
| Ba(2)-O(11)#5  | 2.808(3) | O(7)#8-Ba(2)-O(8)#4    | 84.29(8)   |
| Ba(2)-O(1)     | 2.818(3) | O(8)#7-Ba(2)-O(8)#4    | 62.84(10)  |
| Ba(2)-O(10)#6  | 2.826(3) | F(1)-Ba(2)-O(8)#4      | 113.31(8)  |
| Ba(2)-O(10)#7  | 2.864(3) | O(2)-Ba(2)-O(8)#4      | 142.32(8)  |
| Ba(2)-O(7)#8   | 2.908(3) | O(9)#4-Ba(2)-O(2)#9    | 67.07(9)   |
| Ba(2)-O(8)#7   | 2.941(3) | O(11)#5-Ba(2)-O(2)#9   | 121.53(8)  |
| Ba(2)-F(1)     | 2.966(3) | O(1)-Ba(2)-O(2)#9      | 100.19(9)  |
| Ba(2)-O(2)     | 3.012(3) | O(10)#6-Ba(2)-O(2)#9   | 66.46(8)   |
| Ba(2)-O(8)#4   | 3.114(3) | O(10)#7-Ba(2)-O(2)#9   | 106.38(8)  |
| Ba(2)-O(2)#9   | 3.142(3) | O(7)#8-Ba(2)-O(2)#9    | 87.16(8)   |
| Ba(2)-O(5)#10  | 3.212(3) | O(8)#7-Ba(2)-O(2)#9    | 141.51(8)  |
| Ba(3)-O(12)#5  | 2.760(3) | F(1)-Ba(2)-O(2)#9      | 151.82(9)  |
| Ba(3)-O(12)#11 | 2.760(3) | O(2)-Ba(2)-O(2)#9      | 86.26(9)   |
| Ba(3)-O(1)#1   | 2.791(3) | O(8)#4-Ba(2)-O(2)#9    | 86.79(8)   |
| Ba(3)-O(1)     | 2.791(3) | O(9)#4-Ba(2)-O(5)#10   | 63.47(8)   |
| Ba(3)-O(3)     | 2.873(3) | O(11)#5-Ba(2)-O(5)#10  | 79.67(9)   |
| Ba(3)-O(3)#1   | 2.873(3) | O(1)-Ba(2)-O(5)#10     | 139.35(9)  |
| Ba(3)-O(9)     | 3.140(3) | O(10)#6-Ba(2)-O(5)#10  | 108.44(8)  |
| Ba(3)-O(9)#1   | 3.140(3) | O(10)#7-Ba(2)-O(5)#10  | 114.70(8)  |
| Ba(3)-O(4)     | 3.162(3) | O(7)#8-Ba(2)-O(5)#10   | 63.57(8)   |
| Ba(3)-O(4)#1   | 3.162(3) | O(8)#7-Ba(2)-O(5)#10   | 113.75(8)  |
| Ba(3)-F(1)     | 3.216(3) | F(1)-Ba(2)-O(5)#10     | 136.94(8)  |
| Ba(3)-F(1)#1   | 3.216(3) | O(2)-Ba(2)-O(5)#10     | 102.11(9)  |
| B(1)-O(10)     | 1.449(6) | O(8)#4-Ba(2)-O(5)#10   | 50.95(8)   |
| B(1)-O(6)      | 1.481(6) | O(2)#9-Ba(2)-O(5)#10   | 43.50(8)   |
| B(1)-O(7)      | 1.483(6) | O(12)#5-Ba(3)-O(12)#11 | 105.35(13) |
| B(1)-O(8)      | 1.485(6) | O(12)#5-Ba(3)-O(1)#1   | 50.44(9)   |
| B(2)-O(8)      | 1.356(6) | O(12)#11-Ba(3)-O(1)#1  | 105.02(9)  |
| B(2)-O(9)      | 1.379(6) | O(12)#5-Ba(3)-O(1)     | 105.02(9)  |
| B(2)-O(4)      | 1.383(6) | O(12)#11-Ba(3)-O(1)    | 50.44(9)   |
| B(3)-O(1)      | 1.447(6) | O(1)#1-Ba(3)-O(1)      | 143.69(12) |
| B(3)-O(10)#6   | 1.473(6) | O(12)#5-Ba(3)-O(3)     | 69.90(9)   |

|                      |            |                       |            |
|----------------------|------------|-----------------------|------------|
| B(3)-O(11)           | 1.476(6)   | O(12)#11-Ba(3)-O(3)   | 158.25(9)  |
| B(3)-O(9)#1          | 1.508(6)   | O(1)#1-Ba(3)-O(3)     | 88.41(9)   |
| B(4)-O(5)            | 1.356(6)   | O(1)-Ba(3)-O(3)       | 109.18(9)  |
| B(4)-O(11)#12        | 1.363(6)   | O(12)#5-Ba(3)-O(3)#1  | 158.25(9)  |
| B(4)-O(7)#1          | 1.369(6)   | O(12)#11-Ba(3)-O(3)#1 | 69.90(9)   |
| B(5)-O(6)            | 1.356(6)   | O(1)#1-Ba(3)-O(3)#1   | 109.17(9)  |
| B(5)-O(2)#13         | 1.370(6)   | O(1)-Ba(3)-O(3)#1     | 88.41(9)   |
| B(5)-O(3)#3          | 1.380(6)   | O(3)-Ba(3)-O(3)#1     | 122.29(12) |
| B(6)-O(12)           | 1.429(6)   | O(12)#5-Ba(3)-O(9)    | 91.00(8)   |
| B(6)-F(1)#2          | 1.447(6)   | O(12)#11-Ba(3)-O(9)   | 121.65(8)  |
| B(6)-O(4)#1          | 1.465(6)   | O(1)#1-Ba(3)-O(9)     | 47.17(8)   |
| B(6)-O(3)#1          | 1.472(6)   | O(1)-Ba(3)-O(9)       | 163.42(9)  |
| B(7)-O(1)            | 1.446(6)   | O(3)-Ba(3)-O(9)       | 80.03(8)   |
| B(7)-O(12)#11        | 1.452(6)   | O(3)#1-Ba(3)-O(9)     | 75.02(9)   |
| B(7)-O(5)#14         | 1.490(6)   | O(12)#5-Ba(3)-O(9)#1  | 121.65(8)  |
| B(7)-O(2)            | 1.496(6)   | O(12)#11-Ba(3)-O(9)#1 | 91.00(8)   |
| O(4)#1-Ba(1)-O(4)    | 71.59(14)  | O(1)#1-Ba(3)-O(9)#1   | 163.42(9)  |
| O(4)#1-Ba(1)-O(12)   | 50.71(9)   | O(1)-Ba(3)-O(9)#1     | 47.17(8)   |
| O(4)-Ba(1)-O(12)     | 88.75(10)  | O(3)-Ba(3)-O(9)#1     | 75.02(9)   |
| O(4)#1-Ba(1)-O(12)#1 | 88.75(10)  | O(3)#1-Ba(3)-O(9)#1   | 80.03(8)   |
| O(4)-Ba(1)-O(12)#1   | 50.71(9)   | O(9)-Ba(3)-O(9)#1     | 126.89(11) |
| O(12)-Ba(1)-O(12)#1  | 132.37(12) | O(12)#5-Ba(3)-O(4)    | 99.86(9)   |
| O(4)#1-Ba(1)-O(3)#2  | 98.95(10)  | O(12)#11-Ba(3)-O(4)   | 151.46(9)  |
| O(4)-Ba(1)-O(3)#2    | 154.68(9)  | O(1)#1-Ba(3)-O(4)     | 80.97(9)   |
| O(12)-Ba(1)-O(3)#2   | 67.98(9)   | O(1)-Ba(3)-O(4)       | 134.13(8)  |
| O(12)#1-Ba(1)-O(3)#2 | 154.47(8)  | O(3)-Ba(3)-O(4)       | 46.25(8)   |
| O(4)#1-Ba(1)-O(3)#3  | 154.68(9)  | O(3)#1-Ba(3)-O(4)     | 81.72(9)   |
| O(4)-Ba(1)-O(3)#3    | 98.95(10)  | O(9)-Ba(3)-O(4)       | 43.85(8)   |
| O(12)-Ba(1)-O(3)#3   | 154.47(8)  | O(9)#1-Ba(3)-O(4)     | 86.97(8)   |
| O(12)#1-Ba(1)-O(3)#3 | 67.98(9)   | O(12)#5-Ba(3)-O(4)#1  | 151.46(9)  |
| O(3)#2-Ba(1)-O(3)#3  | 98.44(13)  | O(12)#11-Ba(3)-O(4)#1 | 99.86(9)   |
| O(4)#1-Ba(1)-O(6)#1  | 63.92(9)   | O(1)#1-Ba(3)-O(4)#1   | 134.13(8)  |
| O(4)-Ba(1)-O(6)#1    | 135.20(9)  | O(1)-Ba(3)-O(4)#1     | 80.97(9)   |
| O(12)-Ba(1)-O(6)#1   | 67.55(9)   | O(3)-Ba(3)-O(4)#1     | 81.72(9)   |
| O(12)#1-Ba(1)-O(6)#1 | 121.08(8)  | O(3)#1-Ba(3)-O(4)#1   | 46.25(8)   |
| O(3)#2-Ba(1)-O(6)#1  | 45.39(8)   | O(9)-Ba(3)-O(4)#1     | 86.97(8)   |
| O(3)#3-Ba(1)-O(6)#1  | 119.00(9)  | O(9)#1-Ba(3)-O(4)#1   | 43.85(8)   |
| O(4)#1-Ba(1)-O(6)    | 135.20(9)  | O(4)-Ba(3)-O(4)#1     | 60.10(12)  |
| O(4)-Ba(1)-O(6)      | 63.92(9)   | O(12)#5-Ba(3)-F(1)    | 45.16(8)   |
| O(12)-Ba(1)-O(6)     | 121.08(8)  | O(12)#11-Ba(3)-F(1)   | 70.69(9)   |
| O(12)#1-Ba(1)-O(6)   | 67.55(9)   | O(1)#1-Ba(3)-F(1)     | 87.47(8)   |
| O(3)#2-Ba(1)-O(6)    | 119.00(9)  | O(1)-Ba(3)-F(1)       | 60.78(8)   |
| O(3)#3-Ba(1)-O(6)    | 45.39(8)   | O(3)-Ba(3)-F(1)       | 93.36(8)   |
| O(6)#1-Ba(1)-O(6)    | 160.84(12) | O(3)#1-Ba(3)-F(1)     | 139.98(8)  |

|                       |            |                       |           |
|-----------------------|------------|-----------------------|-----------|
| O(4)#1-Ba(1)-O(5)#1   | 86.22(9)   | O(9)-Ba(3)-F(1)       | 133.96(8) |
| O(4)-Ba(1)-O(5)#1     | 68.37(9)   | O(9)#1-Ba(3)-F(1)     | 93.99(7)  |
| O(12)-Ba(1)-O(5)#1    | 47.96(9)   | O(4)-Ba(3)-F(1)       | 137.85(8) |
| O(12)#1-Ba(1)-O(5)#1  | 116.96(9)  | O(4)#1-Ba(3)-F(1)     | 137.52(8) |
| O(3)#2-Ba(1)-O(5)#1   | 87.96(9)   | O(12)#5-Ba(3)-F(1)#1  | 70.69(9)  |
| O(3)#3-Ba(1)-O(5)#1   | 112.68(8)  | O(12)#11-Ba(3)-F(1)#1 | 45.16(8)  |
| O(6)#1-Ba(1)-O(5)#1   | 112.24(9)  | O(1)#1-Ba(3)-F(1)#1   | 60.78(8)  |
| O(6)-Ba(1)-O(5)#1     | 73.18(9)   | O(1)-Ba(3)-F(1)#1     | 87.47(8)  |
| O(4)#1-Ba(1)-O(5)     | 68.37(9)   | O(3)-Ba(3)-F(1)#1     | 139.98(8) |
| O(4)-Ba(1)-O(5)       | 86.22(9)   | O(3)#1-Ba(3)-F(1)#1   | 93.36(8)  |
| O(12)-Ba(1)-O(5)      | 116.96(9)  | O(9)-Ba(3)-F(1)#1     | 93.99(7)  |
| O(12)#1-Ba(1)-O(5)    | 47.96(9)   | O(9)#1-Ba(3)-F(1)#1   | 133.96(8) |
| O(3)#2-Ba(1)-O(5)     | 112.68(8)  | O(4)-Ba(3)-F(1)#1     | 137.52(8) |
| O(3)#3-Ba(1)-O(5)     | 87.96(9)   | O(4)#1-Ba(3)-F(1)#1   | 137.85(8) |
| O(6)#1-Ba(1)-O(5)     | 73.18(9)   | F(1)-Ba(3)-F(1)#1     | 62.65(11) |
| O(6)-Ba(1)-O(5)       | 112.24(9)  | O(10)-B(1)-O(6)       | 111.1(4)  |
| O(5)#1-Ba(1)-O(5)     | 148.92(12) | O(10)-B(1)-O(7)       | 110.2(4)  |
| O(9)#4-Ba(2)-O(11)#5  | 104.03(9)  | O(6)-B(1)-O(7)        | 106.2(4)  |
| O(9)#4-Ba(2)-O(1)     | 127.46(9)  | O(10)-B(1)-O(8)       | 107.5(4)  |
| O(11)#5-Ba(2)-O(1)    | 123.81(9)  | O(6)-B(1)-O(8)        | 108.0(4)  |
| O(9)#4-Ba(2)-O(10)#6  | 80.01(9)   | O(7)-B(1)-O(8)        | 113.9(4)  |
| O(11)#5-Ba(2)-O(10)#6 | 171.89(9)  | O(8)-B(2)-O(9)        | 119.4(4)  |
| O(1)-Ba(2)-O(10)#6    | 49.97(9)   | O(8)-B(2)-O(4)        | 123.7(4)  |
| O(9)#4-Ba(2)-O(10)#7  | 51.39(8)   | O(9)-B(2)-O(4)        | 116.9(4)  |
| O(11)#5-Ba(2)-O(10)#7 | 109.92(9)  | O(1)-B(3)-O(10)#6     | 109.5(4)  |
| O(1)-Ba(2)-O(10)#7    | 89.66(9)   | O(1)-B(3)-O(11)       | 111.7(4)  |
| O(10)#6-Ba(2)-O(10)#7 | 66.91(11)  | O(10)#6-B(3)-O(11)    | 111.7(4)  |
| O(9)#4-Ba(2)-O(7)#8   | 123.58(8)  | O(1)-B(3)-O(9)#1      | 108.3(4)  |
| O(11)#5-Ba(2)-O(7)#8  | 48.25(9)   | O(10)#6-B(3)-O(9)#1   | 109.8(4)  |
| O(1)-Ba(2)-O(7)#8     | 105.28(9)  | O(11)-B(3)-O(9)#1     | 105.7(3)  |
| O(10)#6-Ba(2)-O(7)#8  | 135.14(9)  | O(5)-B(4)-O(11)#12    | 121.9(5)  |
| O(10)#7-Ba(2)-O(7)#8  | 157.95(9)  | O(5)-B(4)-O(7)#1      | 120.1(4)  |
| O(9)#4-Ba(2)-O(8)#7   | 74.75(9)   | O(11)#12-B(4)-O(7)#1  | 117.7(4)  |
| O(11)#5-Ba(2)-O(8)#7  | 63.00(9)   | O(6)-B(5)-O(2)#13     | 124.8(4)  |
| O(1)-Ba(2)-O(8)#7     | 106.75(9)  | O(6)-B(5)-O(3)#3      | 112.9(4)  |
| O(10)#6-Ba(2)-O(8)#7  | 112.14(9)  | O(2)#13-B(5)-O(3)#3   | 122.2(4)  |
| O(10)#7-Ba(2)-O(8)#7  | 48.08(9)   | O(12)-B(6)-F(1)#2     | 108.4(4)  |
| O(7)#8-Ba(2)-O(8)#7   | 110.93(9)  | O(12)-B(6)-O(4)#1     | 110.9(4)  |
| O(9)#4-Ba(2)-F(1)     | 141.11(9)  | F(1)#2-B(6)-O(4)#1    | 109.8(4)  |
| O(11)#5-Ba(2)-F(1)    | 61.87(8)   | O(12)-B(6)-O(3)#1     | 111.8(4)  |
| O(1)-Ba(2)-F(1)       | 63.83(8)   | F(1)#2-B(6)-O(3)#1    | 107.2(4)  |
| O(10)#6-Ba(2)-F(1)    | 110.57(8)  | O(4)#1-B(6)-O(3)#1    | 108.6(4)  |
| O(10)#7-Ba(2)-F(1)    | 97.00(8)   | O(1)-B(7)-O(12)#11    | 109.4(4)  |
| O(7)#8-Ba(2)-F(1)     | 76.04(8)   | O(1)-B(7)-O(5)#14     | 112.8(4)  |



|                    |           |                       |          |
|--------------------|-----------|-----------------------|----------|
| O(8)#7-Ba(2)-F(1)  | 66.56(8)  | O(12)#11-B(7)-O(5)#14 | 107.7(4) |
| O(9)#4-Ba(2)-O(2)  | 152.47(9) | O(1)-B(7)-O(2)        | 109.0(4) |
| O(11)#5-Ba(2)-O(2) | 95.50(9)  | O(12)#11-B(7)-O(2)    | 113.8(4) |
|                    |           | O(5)#14-B(7)-O(2)     | 104.2(4) |

---

Symmetry transformations used to generate equivalent atoms:

|                            |                             |                             |
|----------------------------|-----------------------------|-----------------------------|
| #1 $-x, y, -z+1/2$         | #2 $x-1/2, y-1/2, z$        | #3 $-x+1/2, y-1/2, -z+1/2$  |
| #4 $x, -y+2, z-1/2$        | #5 $x+1/2, y+1/2, z$        | #6 $x-1/2, -y+3/2, z-1/2$   |
| #7 $-x+1/2, y+1/2, -z+1/2$ | #8 $-x, y+1, -z+1/2$        | #9 $-x-1/2, -y+5/2, -z$     |
| #10 $-x, -y+2, -z$         | #11 $-x-1/2, y+1/2, -z+1/2$ | #12 $x+1/2, y-1/2, z$       |
| #13 $-x, y-1, -z+1/2$      | #14 $x-1/2, y+1/2, z$       | #15 $x, -y+2, z+1/2$        |
| #16 $x, y-1, z$            | #17 $x+1/2, -y+3/2, z+1/2$  | #18 $-x-1/2, y-1/2, -z+1/2$ |

**Table S4** The summary of published fluorooxoborates.

| No. | Compounds                                                                                        | Space Group                                     | FBB                                              | No. | Compounds                                                                                                     | Space Group                     | FBB                                             |
|-----|--------------------------------------------------------------------------------------------------|-------------------------------------------------|--------------------------------------------------|-----|---------------------------------------------------------------------------------------------------------------|---------------------------------|-------------------------------------------------|
| 1   | BaBOF <sub>3</sub> <sup>9</sup>                                                                  | <i>P2<sub>1</sub>/c</i>                         | BO <sub>2</sub> F <sub>2</sub>                   | 23  | CsKB <sub>8</sub> O <sub>12</sub> F <sub>2</sub> <sup>10</sup>                                                | <i>P321</i>                     | B <sub>4</sub> O <sub>8</sub> F                 |
| 2   | SnB <sub>2</sub> O <sub>3</sub> F <sub>2</sub> <sup>11</sup>                                     | <i>P31m</i>                                     | B <sub>2</sub> O <sub>5</sub> F <sub>2</sub>     | 24  | CsRbB <sub>8</sub> O <sub>12</sub> F <sub>2</sub> <sup>10</sup>                                               | <i><math>\bar{p}6_2c</math></i> | B <sub>4</sub> O <sub>8</sub> F                 |
| 3   | PbB <sub>2</sub> O <sub>3</sub> F <sub>2</sub> <sup>12</sup>                                     | <i>P31m</i>                                     | B <sub>2</sub> O <sub>5</sub> F <sub>2</sub>     | 25  | SrB <sub>4</sub> O <sub>6</sub> F <sub>2</sub> <sup>13</sup>                                                  | <i><math>\bar{p}1</math></i>    | B <sub>4</sub> O <sub>8</sub> F <sub>2</sub>    |
| 4   | BaB <sub>2</sub> O <sub>3</sub> F <sub>2</sub> <sup>14</sup>                                     | <i>P2<sub>1</sub></i>                           | B <sub>2</sub> O <sub>6</sub> F                  | 26  | CaB <sub>4</sub> O <sub>6</sub> F <sub>2</sub> <sup>13</sup>                                                  | <i><math>\bar{p}1</math></i>    | B <sub>4</sub> O <sub>8</sub> F <sub>2</sub>    |
| 5   | BiB <sub>2</sub> O <sub>4</sub> F <sup>15, 16</sup>                                              | <i>P32</i>                                      | B <sub>2</sub> O <sub>6</sub> F                  | 27  | BaB <sub>4</sub> O <sub>6</sub> F <sub>2</sub> <sup>17</sup>                                                  | <i>P2<sub>1</sub>/c</i>         | B <sub>4</sub> O <sub>8</sub> F <sub>2</sub>    |
| 6   | Ba[B <sub>2</sub> OF <sub>3</sub> (OH) <sub>2</sub> ] <sub>2</sub> <sup>18</sup>                 | <i>C2/m</i>                                     | B <sub>2</sub> OF <sub>3</sub> (OH) <sub>2</sub> | 28  | KNiB <sub>4</sub> O <sub>6</sub> F <sub>3</sub> <sup>19</sup>                                                 | <i>P2<sub>1</sub>/c</i>         | B <sub>4</sub> O <sub>9</sub> F <sub>3</sub>    |
| 7   | Cs <sub>1.29</sub> Rb <sub>1.71</sub> B <sub>3</sub> O <sub>3</sub> F <sub>6</sub> <sup>20</sup> | <i>P2<sub>1</sub>/c</i>                         | B <sub>3</sub> O <sub>3</sub> F <sub>6</sub>     | 29  | CaB <sub>5</sub> O <sub>7</sub> F <sub>3</sub> <sup>21</sup>                                                  | <i>Cmc2<sub>1</sub></i>         | B <sub>5</sub> O <sub>9</sub> F <sub>3</sub>    |
| 8   | Na <sub>0.76</sub> Rb <sub>2.24</sub> B <sub>3</sub> O <sub>3</sub> F <sub>6</sub> <sup>20</sup> | <i>P2<sub>1</sub>/c</i>                         | B <sub>3</sub> O <sub>3</sub> F <sub>6</sub>     | 30  | PbB <sub>5</sub> O <sub>7</sub> F <sub>3</sub> <sup>22</sup>                                                  | <i>Cmc2<sub>1</sub></i>         | B <sub>5</sub> O <sub>9</sub> F <sub>3</sub>    |
| 9   | K <sub>2.64</sub> Cs <sub>0.36</sub> B <sub>3</sub> O <sub>3</sub> F <sub>6</sub> <sup>20</sup>  | <i>P2<sub>1</sub>/c</i>                         | B <sub>3</sub> O <sub>3</sub> F <sub>6</sub>     | 31  | SrB <sub>5</sub> O <sub>7</sub> F <sub>3</sub> <sup>23</sup>                                                  | <i>Cmc2<sub>1</sub></i>         | B <sub>5</sub> O <sub>9</sub> F <sub>3</sub>    |
| 10  | K <sub>1.66</sub> Rb <sub>1.34</sub> B <sub>3</sub> O <sub>3</sub> F <sub>6</sub> <sup>20</sup>  | <i>P2<sub>1</sub>/c</i>                         | B <sub>3</sub> O <sub>3</sub> F <sub>6</sub>     | 32  | PbB <sub>5</sub> O <sub>8</sub> F <sup>24</sup>                                                               | <i>Pbca</i>                     | B <sub>5</sub> O <sub>10</sub> F                |
| 11  | K <sub>0.42</sub> Rb <sub>2.58</sub> B <sub>3</sub> O <sub>3</sub> F <sub>6</sub> <sup>25</sup>  | <i>Pbcn</i>                                     | B <sub>3</sub> O <sub>3</sub> F <sub>6</sub>     | 33  | BaB <sub>5</sub> O <sub>8</sub> F·xH <sub>2</sub> O <sup>26</sup>                                             | <i>Pbca</i>                     | B <sub>5</sub> O <sub>10</sub> F                |
| 12  | KCs <sub>2</sub> B <sub>3</sub> O <sub>3</sub> F <sub>6</sub> <sup>20</sup>                      | <i>P2<sub>1</sub>/c</i>                         | B <sub>3</sub> O <sub>3</sub> F <sub>6</sub>     | 34  | Li <sub>2</sub> Na <sub>0.9</sub> K <sub>0.1</sub> B <sub>5</sub> O <sub>8</sub> F <sub>2</sub> <sup>27</sup> | <i>Pbcn</i>                     | B <sub>5</sub> O <sub>10</sub> F <sub>2</sub>   |
| 13  | K <sub>2</sub> RbB <sub>3</sub> O <sub>3</sub> F <sub>6</sub> <sup>20</sup>                      | <i>Pbcn</i>                                     | B <sub>3</sub> O <sub>3</sub> F <sub>6</sub>     | 35  | LiB <sub>6</sub> O <sub>9</sub> F <sup>28</sup>                                                               | <i>Pna2<sub>1</sub></i>         | B <sub>6</sub> O <sub>11</sub> F                |
| 14  | Rb <sub>3</sub> B <sub>3</sub> O <sub>3</sub> F <sub>6</sub> <sup>20</sup>                       | <i>P2<sub>1</sub>/c</i>                         | B <sub>3</sub> O <sub>3</sub> F <sub>6</sub>     | 36  | Li <sub>2</sub> B <sub>6</sub> O <sub>9</sub> F <sub>2</sub> <sup>29</sup>                                    | <i>Cc</i>                       | B <sub>6</sub> O <sub>11</sub> F <sub>2</sub>   |
| 15  | Na <sub>3</sub> B <sub>3</sub> O <sub>3</sub> F <sub>6</sub> <sup>30</sup>                       | <i>C2/c</i>                                     | B <sub>3</sub> O <sub>3</sub> F <sub>6</sub>     | 37  | Na <sub>2</sub> B <sub>6</sub> O <sub>9</sub> F <sub>2</sub> <sup>31</sup>                                    | <i>P2<sub>1</sub>/c</i>         | B <sub>6</sub> O <sub>11</sub> F <sub>2</sub>   |
| 16  | K <sub>3</sub> B <sub>3</sub> O <sub>3</sub> F <sub>6</sub> <sup>32</sup>                        | <i>P2<sub>1</sub>/c</i>                         | B <sub>3</sub> O <sub>3</sub> F <sub>6</sub>     | 38  | NaRbB <sub>6</sub> O <sub>9</sub> F <sub>2</sub> <sup>33</sup>                                                | <i>P2<sub>1</sub>/c</i>         | B <sub>6</sub> O <sub>11</sub> F <sub>2</sub>   |
| 17  | Li <sub>2</sub> B <sub>3</sub> O <sub>4</sub> F <sub>3</sub> <sup>34</sup>                       | <i>P2<sub>1</sub>2<sub>1</sub>2<sub>1</sub></i> | B <sub>3</sub> O <sub>5</sub> F <sub>3</sub>     | 39  | K <sub>3</sub> B <sub>6</sub> O <sub>9</sub> F <sub>3</sub> <sup>35</sup>                                     | <i>P21/c</i>                    | B <sub>6</sub> O <sub>11</sub> F <sub>3</sub>   |
| 18  | NaB <sub>4</sub> O <sub>6</sub> F <sup>36</sup>                                                  | <i>C2</i>                                       | B <sub>4</sub> O <sub>8</sub> F                  | 40  | Na <sub>3</sub> B <sub>7</sub> O <sub>11</sub> F <sub>2</sub> <sup>37</sup>                                   | <i>Pnma</i>                     | B <sub>7</sub> O <sub>13</sub> F <sub>2</sub>   |
| 19  | NH <sub>4</sub> B <sub>4</sub> O <sub>6</sub> F <sup>38</sup>                                    | <i>Pna2<sub>1</sub></i>                         | B <sub>4</sub> O <sub>8</sub> F                  | 41  | K <sub>10</sub> B <sub>13</sub> O <sub>15</sub> F <sub>19</sub> <sup>39</sup>                                 | <i>R3m</i>                      | B <sub>10</sub> O <sub>12</sub> F <sub>13</sub> |
| 20  | CsB <sub>4</sub> O <sub>6</sub> F <sup>40</sup>                                                  | <i>Pna2<sub>1</sub></i>                         | B <sub>4</sub> O <sub>8</sub> F                  | 42  | Rb <sub>10</sub> B <sub>13</sub> O <sub>15</sub> F <sub>19</sub> <sup>39</sup>                                | <i>R3m</i>                      | B <sub>10</sub> O <sub>12</sub> F <sub>13</sub> |
| 21  | BaB <sub>8</sub> O <sub>12</sub> F <sub>2</sub> <sup>41</sup>                                    | <i>R3c</i>                                      | B <sub>4</sub> O <sub>8</sub> F                  | 43  | Ba <sub>3</sub> B <sub>10</sub> O <sub>17</sub> F <sub>2</sub> ·0.1KF <sup>42</sup>                           | <i><math>\bar{p}1</math></i>    | B <sub>10</sub> O <sub>21</sub> F               |
| 22  | RbB <sub>4</sub> O <sub>6</sub> F <sup>10</sup>                                                  | <i>Pna2<sub>1</sub></i>                         | B <sub>4</sub> O <sub>8</sub> F                  |     |                                                                                                               |                                 |                                                 |

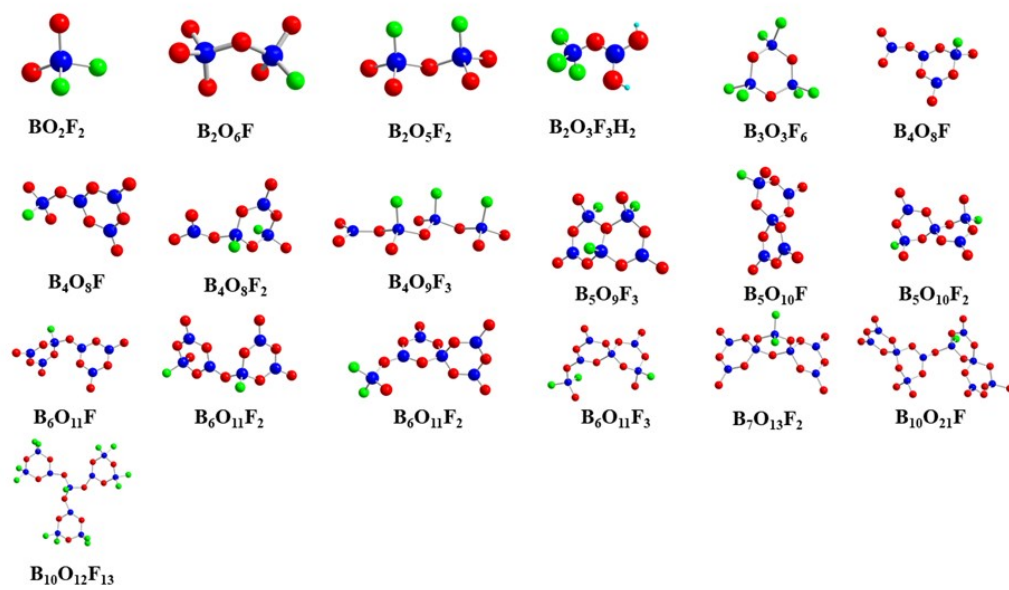

**Figure S1.** The different types of FBBs in published fluorooxoborates.

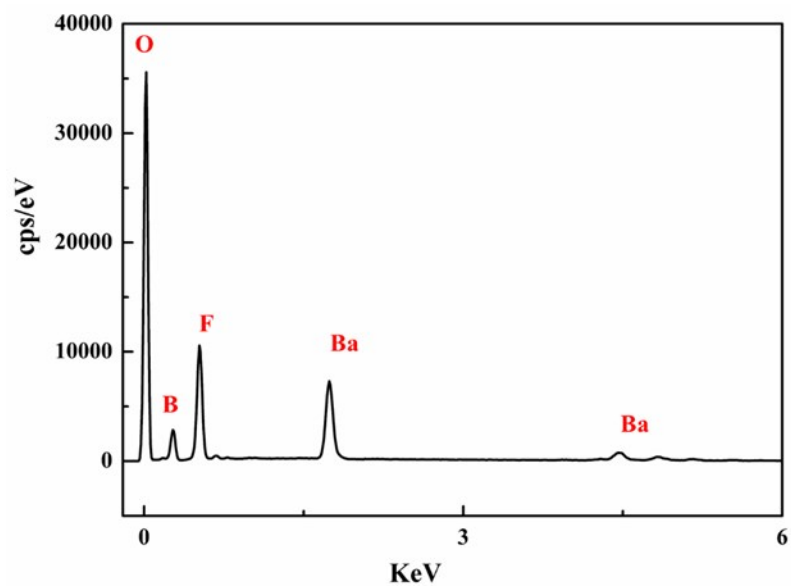

**Figure S2.** The energy dispersive X-ray spectrum for  $\text{Ba}_2\text{B}_7\text{O}_{12}\text{F}$ .

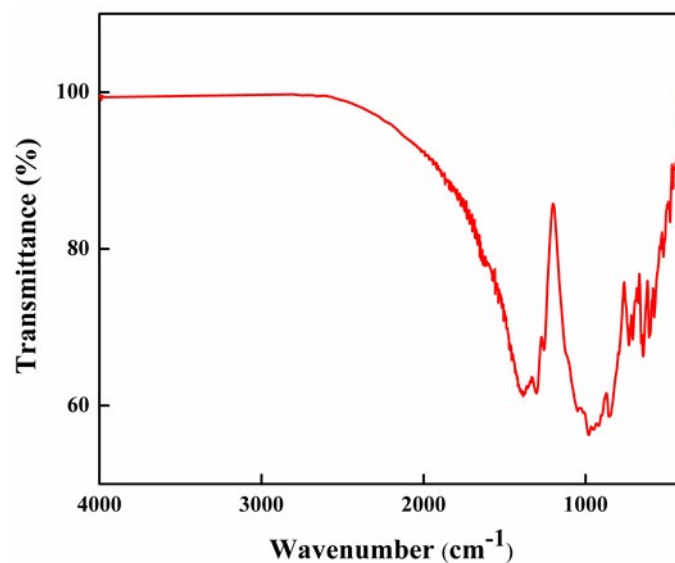

**Figure S3.** The infrared spectrum of  $\text{Ba}_2\text{B}_7\text{O}_{12}\text{F}$ .

Assignment of the absorption bands observed in the IR spectrum for  $\text{Ba}_2\text{B}_7\text{O}_{12}\text{F}$ .

| Mode description                                                  | IR ( $\text{cm}^{-1}$ ) for $\text{Ba}_2\text{B}_7\text{O}_{12}\text{F}$ |
|-------------------------------------------------------------------|--------------------------------------------------------------------------|
| asymmetric stretching vibration of $[\text{BO}_3]$ groups         | 1385 and 1265                                                            |
| asymmetric stretching vibration of $[\text{BO}_4]$ groups         | 1041                                                                     |
| asymmetric stretching vibration of $[\text{BO}_3\text{F}]$ groups | 994                                                                      |
| symmetric extension of $[\text{BO}_3]$ groups                     | 977                                                                      |
| symmetric stretching vibration of $[\text{BO}_4]$ groups          | 849                                                                      |
| symmetric stretching vibration of $[\text{BO}_3\text{F}]$ groups  | 761                                                                      |
| out-of-plane bending of $[\text{BO}_3]$ groups                    | 642 and 610                                                              |
| bending of in-plane bending of $[\text{BO}_3]$ groups             | 522                                                                      |

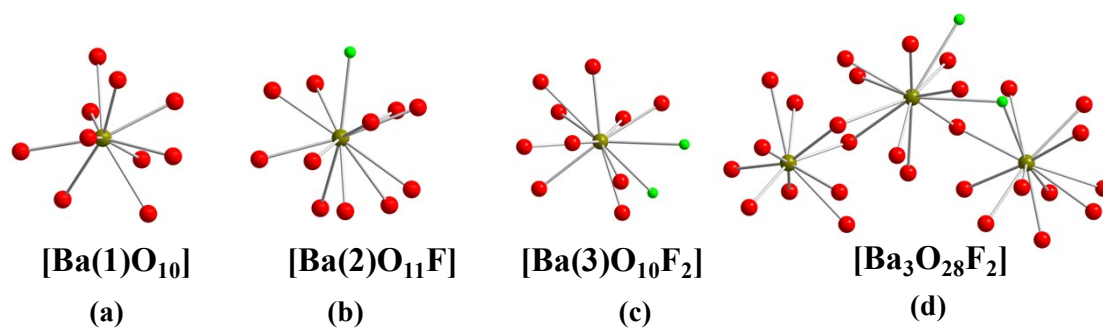

**Figure S4.** The coordination environments of the Ba<sup>2+</sup> cations in Ba<sub>2</sub>B<sub>7</sub>O<sub>12</sub>F.

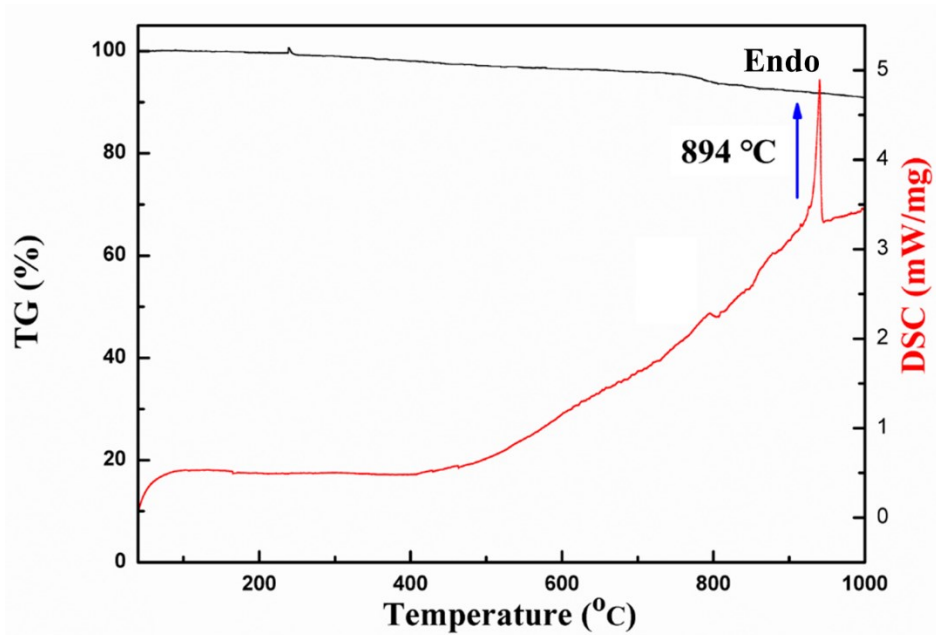

(a)

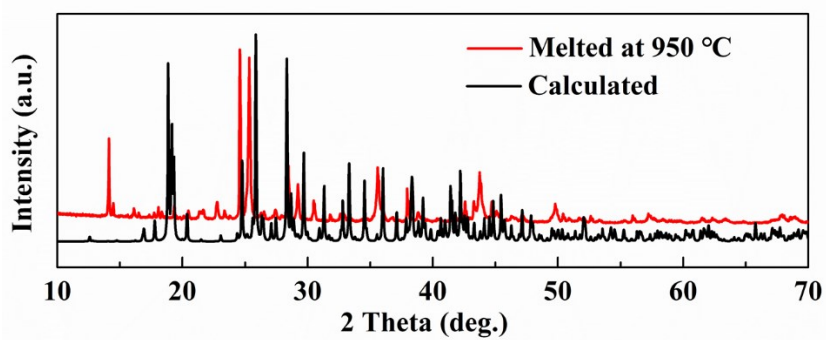

(b)

**Figure S5.** TG-DSC curves of  $\text{Ba}_2\text{B}_7\text{O}_{12}\text{F}$  (a), and the XRD patterns of the melted residual (b).

## References

1. SAINT, version 7.60A, Bruker Analytical X-ray Instruments, Inc., Madison, WI, 2008.
2. G. M. Sheldrick, Crystal structure refinement with SHELXL, *Acta. Crystallogr. C*, 2015, **71**, 3-8.
3. A. Spek, Single-crystal structure validation with the program PLATON, *J Appl Crystallogr*, 2003, **36**, 7-13.
4. S. J. Clark, M. D. Segall, C. J. Pickard, P. J. Hasnip, M. I. Probert, K. Refson and M. C. Payne, First principles methods using CASTEP, *Z. Kristallogr. Cryst. Mater.*, 2005, **220**, 567-570.
5. L. Kleinman and D. M. Bylander, Efficient form for model pseudopotentials, *Phys. Rev. Lett.*, 1982, **48**, 1425.
6. A. M. Rappe, K. M. Rabe, E. Kaxiras and J. D. Joannopoulos, Optimized pseudopotentials, *Phys. Rev. B*, 1990, **41**, 1227-1230.
7. J. Lin, A. Qteish, M. Payne and V. Heine, Optimized and transferable nonlocal separable ab initio pseudopotentials, *Phys. Rev. B.*, 1993, **47**, 4174.
8. H. J. Monkhorst and J. D. Pack, Special points for Brillouin-zone integrations, *Phys. Rev. B*, 1976, **13**, 5188-5192.
9. D. Jiang, Y. Wang, H. Li, Z. Yang and S. Pan, BaBOF<sub>3</sub>: A new aurivillius-like borate containing two types of F atoms, *Dalton Trans.*, 2018, **47**, 5157-5160.
10. Y. Wang, B. Zhang, Z. Yang and S. Pan, Cation-tuned synthesis of fluorooxoborates: Approaching the optimal deep-ultraviolet nonlinear optical materials, *Angew. Chem. Int. Ed.*, 2018, **57**, 2150-2154.
11. S. G. Jantz, M. Dialer, L. Bayarjargal, B. Winkler, L. van Wüllen, F. Pielhofer, J. Brgoch, R. Weihrich and H. A. Höpfe, Sn[B<sub>2</sub>O<sub>3</sub>F<sub>2</sub>]-The first tin fluorooxoborate as possible NLO material, *Adv. Opt. Mater.*, 2018, **6**, 1800497.
12. M. Luo, F. Liang, Y. Song, D. Zhao, N. Ye and Z. S. Lin, Rational design of the first lead/tin fluorooxoborates MB<sub>2</sub>O<sub>3</sub>F<sub>2</sub> (M = Pb, Sn), containing flexible two-dimensional [B<sub>6</sub>O<sub>12</sub>F<sub>6</sub>] infinity single layers with widely divergent second harmonic generation effects, *J. Am. Chem. Soc.*, 2018, **140**, 6814-6817.
13. Z. Z. Zhang, Y. Wang, B. B. Zhang, Z. H. Yang and S. L. Pan, Designing deep-UV birefringent crystals by cation regulation, *Chem. Eur. J.*, 2018, **24**, 11267-11272.
14. C. M. Huang, F. F. Zhang, H. Li, Z. H. Yang, H. W. Yu and S. L. Pan, BaB<sub>2</sub>O<sub>3</sub>F<sub>2</sub> : A barium fluorooxoborate with a unique [B<sub>2</sub>O<sub>3</sub>F]<sup>-</sup> layer and short cutoff edge. *Chem. Eur. J.* **2019**, **25**, 6693-6697.
15. Li, L.; Li, G.; Wang, Y.; Liao, F.; Lin, J., Bismuth borates: one-dimensional borate chains and nonlinear optical properties, *Chem. Eur. J.*, 2019, **25**, 6693-6697.
16. R. Cong, Y. Wang, L. Kang, Z. Zhou, Z. S. Lin and T. Yang, An outstanding second-harmonic generation material BiB<sub>2</sub>O<sub>4</sub>F: Exploiting the electron-withdrawing ability of fluorine, *Inorg. Chem. Front.*, 2015, **2**, 170-176.
17. S. G. Jantz, F. Pielhofer, L. van Wullen, R. Weihrich, M. J. Schafer and H. A. Hoppe, The first alkaline-earth fluorooxoborate Ba[B<sub>4</sub>O<sub>6</sub>F<sub>2</sub>]-characterisation and doping with Eu<sup>2+</sup>, *Chem. Eur. J.*, 2018, **24**, 443-450.
18. M. Q. Gai, Y. Wang, T. H. Tong, L. Y. Wang, Z. H. Yang, X. Zhou and S. L. Pan, Ba(B<sub>2</sub>OF<sub>3</sub>(OH)<sub>2</sub>)<sub>2</sub> with well-ordered OH/F anions and a unique B<sub>2</sub>OF<sub>3</sub>(OH)<sub>2</sub> dimer, *Chem. Commun.*, 2020, **56**, 3301-3304.
19. C. Tao and R. K. Li, KNiB<sub>4</sub>O<sub>6</sub>F<sub>3</sub> : A layered fluorooxoborate with charge-oriented ordering,



- Chem. Eur. J.*, 2020, **26**, 3709-3712.
20. W. Y. Zhang, Z. L. Wei, Z. H. Yang and S. L. Pan, Cation modulation on the crystal structure and band gap of fluorooxoborates  $A_3B_3O_3F_6$  (A = alkali and mixed alkali metal), *Inorg. Chem.*, 2019, **58**, 13411-13417.
  21. Z. Z. Zhang, Y. Wang, B. B. Zhang, Z. H. Yang and S. L. Pan,  $CaB_5O_7F_3$ : A beryllium-free alkaline-earth fluorooxoborate exhibiting excellent nonlinear optical performances, *Inorg. Chem.*, 2018, **57**, 4820-4823.
  22. S. J. Han, M. Mutailipu, A. Tudi, Z. H. Yang and S. L. Pan,  $PbB_5O_7F_3$ : A high-performing short-wavelength nonlinear optical material, *Chem. Mater.*, 2020, **32**, 2172-2179.
  23. M. Mutailipu, M. Zhang, B. B. Zhang, L. Y. Wang, Z. H. Yang, X. Zhou and S. L. Pan,  $SrB_5O_7F_3$  functionalized with  $[B_5O_9F_3]^{6-}$  chromophores: Accelerating the rational design of deep-ultraviolet nonlinear optical materials, *Angew. Chem. Int. Ed.*, 2018, **57**, 6095-6099.
  24. M. Mutailipu, M. Zhang, B. B. Zhang, Z. H. Yang and S. L. Pan, The first lead fluorooxoborate  $PbB_5O_8F$ : Achieving the coexistence of large birefringence and deep-ultraviolet cut-off edge, *Chem. Commun.*, 2018, **54**, 6308-6311.
  25. D. Q. Jiang, G. P. Han, Y. Wang, H. Li, Z. H. Yang and S. L. Pan, Designing three fluorooxoborates with a wide transmittance window by anionic group substitution, *Inorg. Chem.*, 2019, **58**, 3596-3600.
  26. C. M. Huang, G. P. Han, H. Li, F. F. Zhang, Z. H. Yang and S. L. Pan, A new barium fluorooxoborate  $BaB_5O_8F \cdot xH_2O$  with large birefringence and a wide UV transparency window, *Dalton Trans.*, 2019, **48**, 6714-6717.
  27. S. J. Han, Y. Wang, B. B. Zhang, Z. H. Yang and S. L. Pan, A member of fluorooxoborates:  $Li_2Na_{0.9}K_{0.1}B_5O_8F_2$  with the fundamental building block  $B_5O_{10}F_2$  and a short cutoff edge, *Inorg. Chem.*, 2018, **57**, 873-878.
  28. G. Cakmak, J. Nuss and M. Jansen,  $LiB_6O_9F$ , the first lithium fluorooxoborate - crystal structure and ionic conductivity, *Z. Anorg. Allg. Chem.*, 2009, **635**, 631-636.
  29. T. Pilz and M. Jansen,  $Li_2B_6O_9F_2$ , a new acentric fluorooxoborate, *Z. Anorg. Allg. Chem.*, 2011, **637**, 2148-2152.
  30. G. Cakmak, T. Pilz and M. Jansen,  $Na_3B_3O_3F_6$ : Synthesis, crystal structure, and ionic conductivity, *Z. Anorg. Allg. Chem.*, 2012, **638**, 1411-1415.
  31. G. Q. Shi, F. F. Zhang, B. B. Zhang, D. W. Hou, X. L. Chen, Z. H. Yang and S. L. Pan,  $Na_2B_6O_9F_2$ : A fluoroborate with short cutoff edge and deep-ultraviolet birefringent property prepared by an open high-temperature solution method, *Inorg. Chem.*, 2017, **56**, 344-350.
  32. H. P. Wu, H. W. Yu, Q. Bian, Z. H. Yang, S. J. Han and S. L. Pan, Borate fluoride and fluoroborate in alkali-metal borate prepared by an open high-temperature solution method, *Inorg. Chem.*, 2014, **53**, 12686-12688.
  33. S. J. Han, B. B. Zhang, Z. H. Yang and S. L. Pan, From  $LiB_3O_5$  to  $NaRbB_6O_9F_2$ : Fluorine-directed evolution of structural chemistry, *Chem. Eur. J.*, 2018, **24**, 10022-10027.
  34. T. Pilz, H. Nuss and M. Jansen,  $Li_2B_3O_4F_3$ , a new lithium-rich fluorooxoborate, *J. Solid State Chem.*, 2012, **186**, 104-108.
  35. G. P. Han,, F. F. Zhang,, G. Q. Shi, B. B. Zhang, S. J. Han,, Z. H. Yang, Y. Wang, and S. L. Pan,  $K_3B_6O_9F_3$ : A new fluorooxoborate with four different anionic units, *Chem. Eur. J.*, 2018, **24**, 4497-4502.
  36. Z. Z. Zhang, Y. Wang, B. B. Zhang, Z. H. Yang and S. L. Pan, Polar fluorooxoborate  $NaB_4O_6F$ : A

- promising material for ionic conduction and nonlinear optics, *Angew. Chem. Int. Ed.*, 2018, **130**, 6687-6691.
37. C. C. Tang, X. X. Jiang, W. L. Yin, L. J. Liu, M. J. Xia, Q. Huang, G. Song, X. Wang, Z. S. Lin and C. T. Chen, Na<sub>3</sub>B<sub>7</sub>O<sub>11</sub>F<sub>2</sub>: A new sodium-rich fluorooxoborate with a unique [B<sub>14</sub>O<sub>24</sub>F<sub>4</sub>] ring and a short ultraviolet absorption edge, *Dalton Trans.*, 2018, **48**, 21-24.
38. G. Q. Shi, Y. Wang, F. F. Zhang, B. B. Zhang, Z. H. Yang, X. L. Hou, S. L. Pan and K. R. Poeppelmeier, Finding the next deep-ultraviolet nonlinear optical material: NH<sub>4</sub>B<sub>4</sub>O<sub>6</sub>F, *J. Am. Chem. Soc.*, 2017, **139**, 10645-10648.
39. W. Y. Zhang, Z. L. Wei, Z. H. Yang and S. L. Pan, Noncentrosymmetric fluorooxoborates A<sub>10</sub>B<sub>13</sub>O<sub>15</sub>F<sub>19</sub> (A = K and Rb) with unexpected [B<sub>10</sub>O<sub>12</sub>F<sub>13</sub>]<sup>7-</sup> units and deep-ultraviolet cutoff edges, *Inorg. Chem.*, 2020, **59**, 3274-3280.
40. X. F. Wang, Y. Wang, B. B. Zhang, F. F. Zhang, Z. H. Yang and S. L. Pan, CsB<sub>4</sub>O<sub>6</sub>F: A congruent-melting deep-ultraviolet nonlinear optical material by combining superior functional units, *Angew. Chem. Int. Ed.*, 2017, **129**, 14307-14311.
41. Z. Z. Zhang, Y. Wang, H. Li, Z. H. Yang and S. L. Pan, BaB<sub>8</sub>O<sub>12</sub>F<sub>2</sub>: A promising deep-UV birefringent material, *Inorg. Chem. Front.*, 2019, **6**, 546-549.
42. Y. H. Li, H. W. Yu, G. P. Han, H. Li, Z. H. Yang and S. L. Pan, Ba<sub>3</sub>B<sub>10</sub>O<sub>17</sub>F<sub>2</sub>·0.1KF: The first mixed alkali/alkaline-earth metal fluorooxoborate with unprecedented double-layered B-O/F anionic arrangement, *Chem. Commun.*, 2019, **55**, 8923-8926.
